# Supplementary material for: Layer-by-layer assembled enzyme multilayers with adjustable memory performance and low power consumption via molecular-level control
Source: Royal Society of Chemistry journal article supplement (doi:10.1039/c2jm16231h), 2012-01-01
Supplement: c2jm16231h.pdf [file c2jm16231h.pdf]

## Supporting Information

# Layer-by-Layer Assembled Enzyme Multilayers with Adjustable Memory Performance and Low Power Consumption *via* Molecular-Level Control

Hyunhee Baek, Chanwoo Lee, Jeongju Park, Younghoon Kim, Bonkee Koo, Hyunjung Shin, Dyang

Wang and Jinhan Cho\*

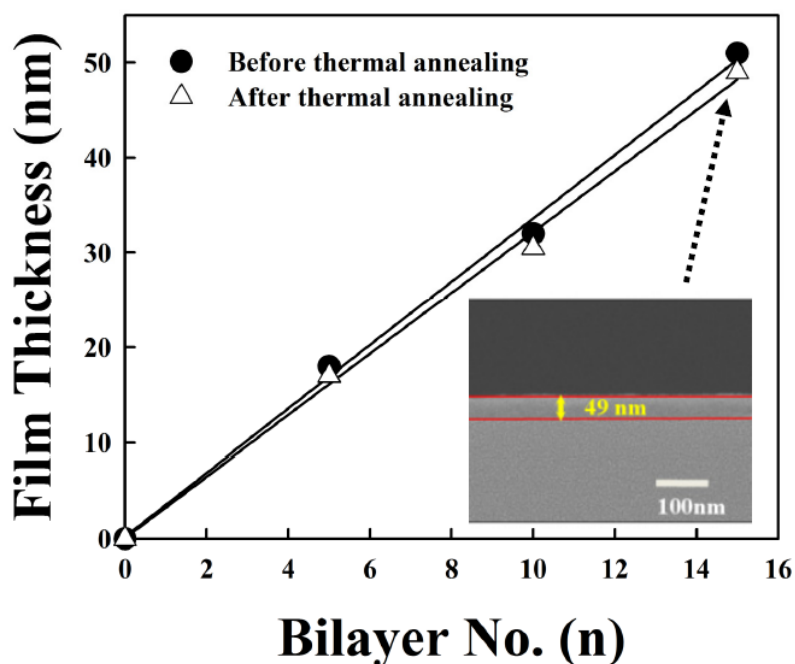

**Figure S1.** Film thicknesses of  $(\text{PAH}/\text{CAT})_{n=5,10}$  and 15 multilayers measured from cross-sectional SEM images before and after thermal annealing at 150 °C for 1 hr. The inset indicates cross-sectional SEM image of 15 bilayered films after thermal drying.

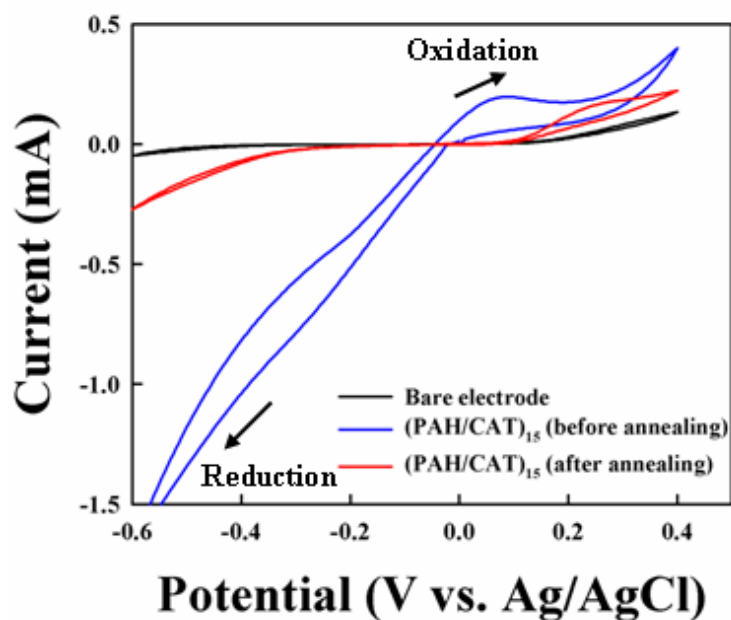

**Figure S2.** Cyclic voltammograms of bare gold electrode and (PAH/CAT)<sub>15</sub> multilayer-coated onto electrode in pH 7.0 PBS containing 21 mM H<sub>2</sub>O<sub>2</sub> with scan rate = 0.05 V·s<sup>-1</sup>. Redox reaction of PAH/CAT multilayers is occurred from the following reactions: (1) CAT-Fe<sup>III</sup> + H<sub>2</sub>O<sub>2</sub> → [CatalaseFe<sup>IV</sup>=O]<sup>\*</sup> + H<sub>2</sub>O, (2) [CatalaseFe<sup>IV</sup>=O]<sup>\*</sup> + H<sub>2</sub>O<sub>2</sub> → CatalaseFe<sup>III</sup> + O<sub>2</sub> + H<sub>2</sub>O.

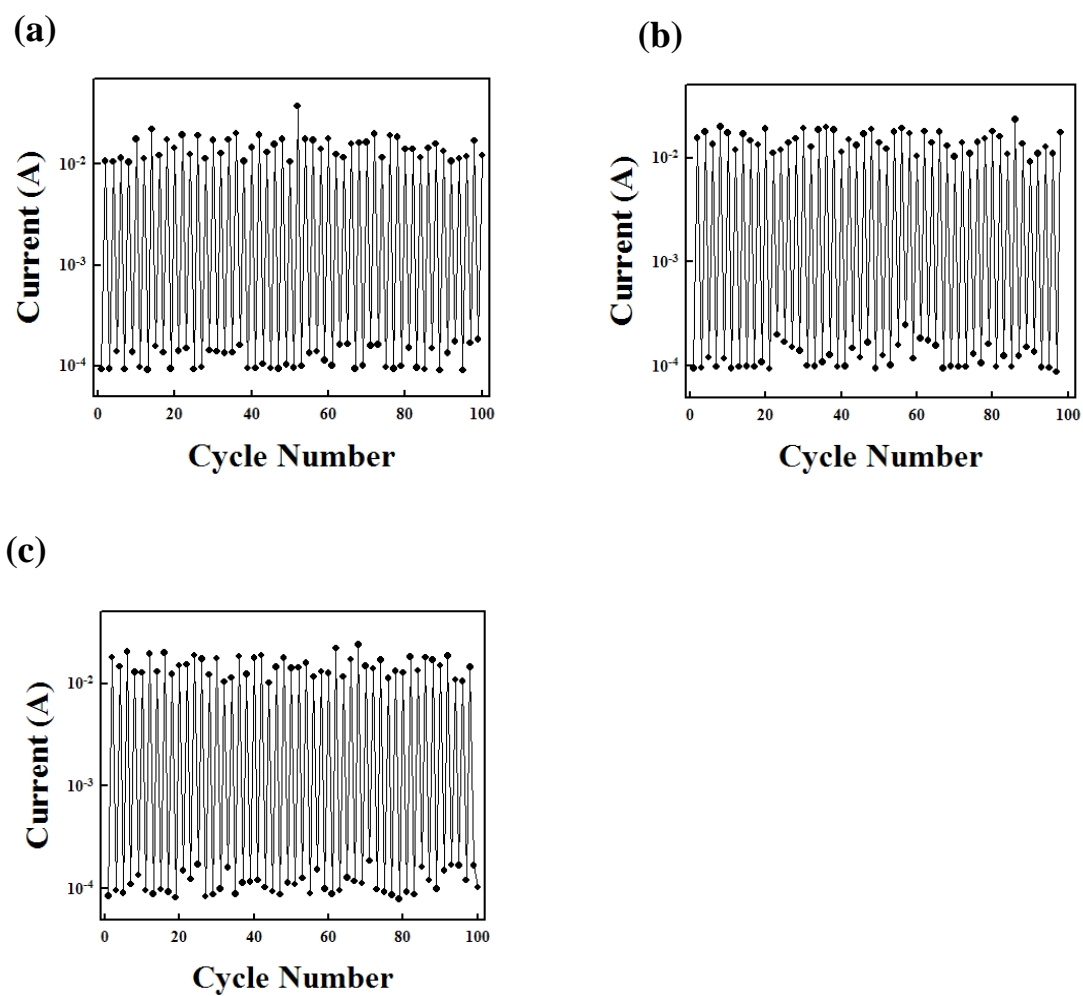

**Figure S3.** Cycling tests of (PAH/CAT)<sub>15</sub> multilayers. The electrical measurements were operated at an applied voltage pulse with (a) 300, (b) 500 and (c) 1 μs width in the air environment.

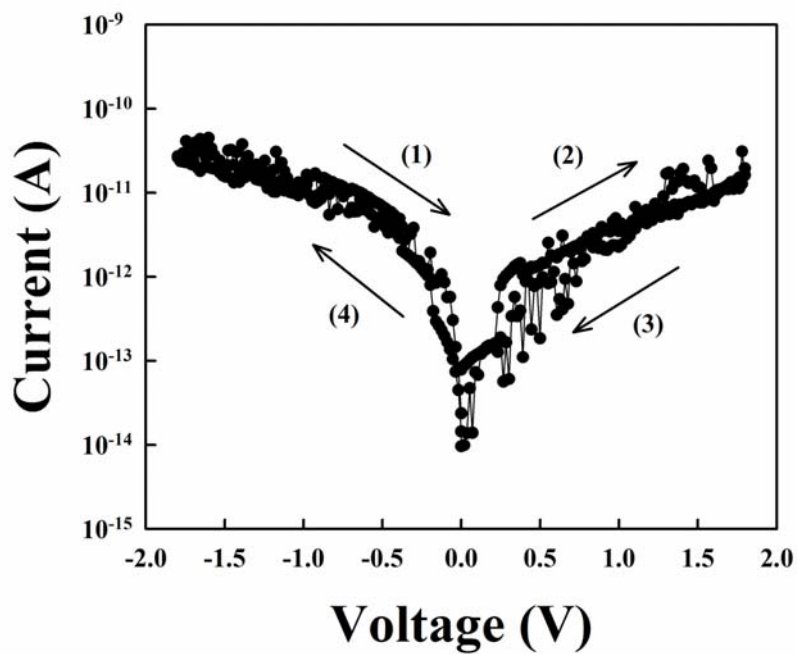

**Figure S4.** *I-V* characteristics of (PAH/poly(acrylic acid) (PAA))<sub>10</sub> composed of insulating polyelectrolytes. Top and bottom electrodes were Pt and Ag electrodes.

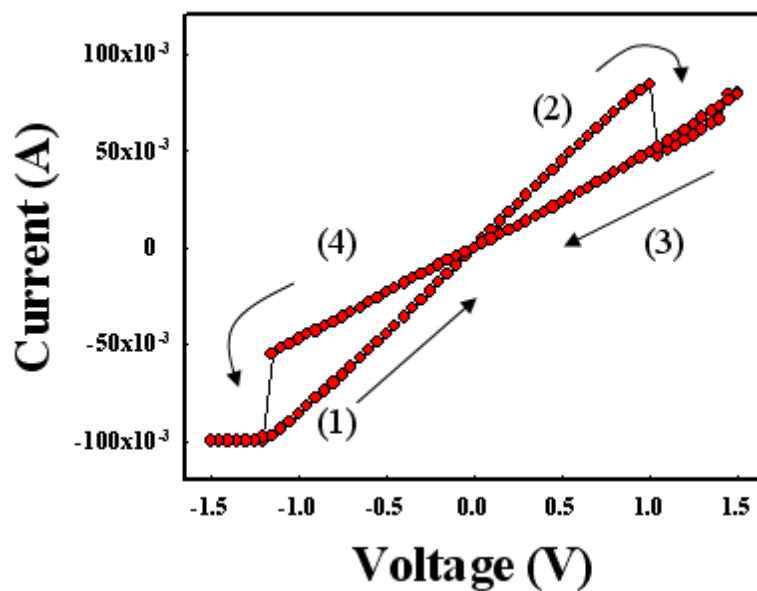

**Figure S5.** *I-V* curve of (haemoglobin/PSS)<sub>15</sub> multilayers measured from tungsten tip electrode. The electrical measurements were operated at an applied voltage pulse with a 1  $\mu$ s width in the air environment.
